# Supplementary material
Source: publisher figshare collection journal article supplement (https://tandf.figshare.com/articles/dataset/_/1568573)
Supplement: Supplementary file 2 [file 4]

Supplementary Table 3: Differentially Expressed Genes (DEGs) between DEX-CLEN and CTR groups (DEX-CLEN vs. CTR).

| #  | Agilent Array ID | Symbol           | Corresponding Gene | Gene Full Name                                                | ENTREZ ID | Fold Change | q Value (FDR%) |
|----|------------------|------------------|--------------------|---------------------------------------------------------------|-----------|-------------|----------------|
| 1  | A_73_115652      | <b>AGRP</b>      | AGRP               | agouti related neuropeptide                                   | 280987    | <b>3.13</b> | 3.61           |
| 2  | A_73_115239      | <b>HSPA8</b>     | HSPA8              | heat shock 70kDa protein 8                                    | 281831    | <b>2.11</b> | 2.06           |
| 3  | A_73_108532      | <b>KCNQ3</b>     | KCNQ3              | potassium voltage-gated channel, KQT-like subfamily, member 3 | 281884    | <b>2.52</b> | 2.06           |
| 4  | A_73_110197      | <b>PAPPA</b>     | PAPPA              | pregnancy-associated plasma protein A, pappalysin 1           | 282647    | <b>2.71</b> | 2.06           |
| 5  | A_73_106958      | <b>LOC505743</b> | MRAP               | melanocortin 2 receptor accessory protein                     | 505743    | <b>2.09</b> | 2.06           |
| 6  | A_73_107708      | <b>LOC509704</b> | MYRF               | myelin regulatory factor                                      | 509704    | <b>2.16</b> | 2.06           |
| 7  | A_73_104427      | <b>LOC511921</b> | CDHR2              | cadherin-related family member 2                              | 511921    | <b>2.00</b> | 2.06           |
| 8  | A_73_111262      | <b>LOC519845</b> | TOX2               | TOX high mobility group box family member 2                   | 519845    | <b>2.03</b> | 2.06           |
| 9  | A_73_108404      | <b>LOC520147</b> | LHFPL3             | lipoma HMGIC fusion partner-like 3                            | 520147    | <b>2.21</b> | 2.06           |
| 10 | A_73_107377      | <b>LOC529615</b> | HORMAD1            | HORMA domain containing 1                                     | 529615    | <b>2.44</b> | 3.61           |
| 11 | A_73_100230      | <b>LOC529618</b> | GRIA1              | glutamate receptor, ionotropic, AMPA 1                        | 529618    | <b>2.32</b> | 4.81           |
| 12 | A_73_117821      | <b>LOC533630</b> | PSPH               | phosphoserine phosphatase                                     | 533630    | <b>2.19</b> | 0.00           |
| 13 | A_73_113558      | <b>LOC536137</b> | ADAMTS20           | ADAM metallopeptidase with thrombospondin type 1 motif, 20    | 536137    | <b>2.72</b> | 2.06           |
| 14 | A_73_108152      | <b>LOC539619</b> | LRRN1              | leucine rich repeat neuronal 1                                | 539619    | <b>3.86</b> | 2.06           |
| 15 | A_73_105575      | <b>LOC616608</b> | DNAJC5G            | DnaJ (Hsp40) homolog, subfamily C, member 5 gamma             | 616608    | <b>2.27</b> | 3.61           |
| 16 | A_73_106033      | <b>MGC128110</b> | STIP1              | stress-induced phosphoprotein 1                               | 617109    | <b>2.55</b> | 2.06           |
| 17 | A_73_102619      | <b>CB431313</b>  | EST                | 607277 MARC 6BOV Bos taurus cDNA 5-, mRNA sequence            | NA        | <b>3.28</b> | 2.06           |
| 18 | A_73_116135      | <b>BF606645</b>  | EST                | 273743 MARC 3BOV Bos taurus cDNA 5-, mRNA sequence            | NA        | <b>2.86</b> | 2.06           |
| 19 | A_73_101764      | <b>CB430575</b>  | EST                | 606477 MARC 6BOV Bos taurus cDNA 3-, mRNA sequence            | NA        | <b>2.42</b> | 3.61           |
| 20 | A_73_110375      | <b>AW483508</b>  | EST                | 54743 MARC 1BOV Bos taurus cDNA 5-, mRNA sequence             | NA        | <b>2.40</b> | 2.06           |
| 21 | A_73_112015      | <b>EE943045</b>  | EST                | G57950A FLM Bos taurus cDNA clone G5795 5-, mRNA sequence     | NA        | <b>2.34</b> | 3.61           |
| 22 | A_73_120098      | <b>EE926639</b>  | EST                | C05641A FLM Bos taurus cDNA clone C0564 3-, mRNA sequence     | NA        | <b>2.24</b> | 3.61           |

|    |             |                  |           |                                                                      |        |              |      |
|----|-------------|------------------|-----------|----------------------------------------------------------------------|--------|--------------|------|
| 23 | A_73_102184 | <b>BF074022</b>  | EST       | 221311 MARC 2BOV Bos taurus cDNA 5-, mRNA sequence                   | NA     | <b>2.14</b>  | 2.06 |
| 24 | A_73_114073 | <b>LOC529396</b> | Withdrawn | ////                                                                 | NA     | <b>2.34</b>  | 0.00 |
| 25 | A_73_120511 | <b>LOC514874</b> | Withdrawn | ////                                                                 | NA     | <b>2.26</b>  | 2.06 |
| 26 | A_73_113096 | <b>LOC517873</b> | Withdrawn | ////                                                                 | NA     | <b>3.44</b>  | 3.61 |
| 27 | A_73_120144 | <b>LOC614397</b> | Withdrawn | ////                                                                 | NA     | <b>2.68</b>  | 0.00 |
| 28 | A_73_114282 | <b>LOC522906</b> | Withdrawn | ////                                                                 | NA     | <b>2.37</b>  | 4.81 |
| 29 | A_73_114081 | <b>LOC520463</b> | SLC50A1   | solute carrier family 50 (sugar efflux transporter), member 1        | 520463 | <b>-7.28</b> | 0.00 |
| 30 | A_73_112805 | <b>LOC534859</b> | B3GNT8    | UDP-GlcNAc:betaGal beta-1,3-N-acetylglucosaminyltransferase 8        | 534859 | <b>-4.10</b> | 0.00 |
| 31 | A_73_117391 | <b>LOC513597</b> | MYOF      | myoferlin                                                            | 513597 | <b>-3.44</b> | 0.00 |
| 32 | A_73_116856 | <b>LOC518469</b> | GPCPD1    | glycerophosphocholine phosphodiesterase GDE1 homolog (S. cerevisiae) | 518469 | <b>-2.92</b> | 5.22 |
| 33 | A_73_114532 | <b>LOC514028</b> | DSE       | dermatan sulfate epimerase                                           | NA     | <b>-2.40</b> | 5.22 |
| 34 | A_73_106175 | <b>AW417127</b>  | EST       | 53100 MARC 1BOV Bos taurus cDNA 5-, mRNA sequence                    | NA     | <b>-3.24</b> | 5.22 |
| 35 | A_73_105177 | <b>CB459525</b>  | EST       | 719308 MARC 6BOV Bos taurus cDNA 5-, mRNA sequence                   | NA     | <b>-3.13</b> | 5.22 |
| 36 | A_73_105920 | <b>CB451845</b>  | EST       | 706643 MARC 6BOV Bos taurus cDNA 3-, mRNA sequence                   | NA     | <b>-2.72</b> | 0.00 |
| 37 | A_73_108130 | <b>CB461540</b>  | EST       | 721519 MARC 6BOV Bos taurus cDNA 5-, mRNA sequence                   | NA     | <b>-2.25</b> | 5.22 |
| 38 | A_73_118413 | <b>EE897789</b>  | EST       | A02190A FFB Bos taurus cDNA clone A0219 5-, mRNA sequence            | NA     | <b>-2.08</b> | 5.22 |
| 39 | A_73_101119 | <b>CB457253</b>  | EST       | 714591 MARC 6BOV Bos taurus cDNA 5-, mRNA sequence                   | NA     | <b>-2.05</b> | 5.22 |

**NOTES:**

EST: Estimated Sequence Tag

NA: Not Available

Withdrawn: Not available anymore in the genebank database (edited or deleted)
