# Supplementary material
Source: publisher figshare collection journal article supplement (https://tandf.figshare.com/articles/dataset/_/1568573)
Supplement: Supplementary file 3 [file 4]

Analysis Name: B4 CTR vs DEX-2 - 2014-03-26 03:49 PM

Analysis Creation Date: 2014-03-26

Build version: 261899

Content version: 18030641 (Release Date: 2013-12-06)

## Analysis settings

[View](#)

Reference set: Bovine

Relationship to include: Direct and Indirect

Includes Endogenous Chemicals

Optional Analyses: My Pathways My List

Filter Summary:

Consider only relationships where  
confidence = Experimentally Observed

Cutoff:

## Top Networks

| ID | Associated Network Functions                                       | Score |
|----|--------------------------------------------------------------------|-------|
| 1  | Developmental Disorder, Hereditary Disorder, Immunological Disease | 30    |
| 2  | Cellular Movement, Cancer, Organismal Injury and Abnormalities     | 30    |
| 3  | Cell Morphology, Cellular Assembly and Organization, Cancer        | 25    |

|   |                                                                                             |    |
|---|---------------------------------------------------------------------------------------------|----|
| 4 | Auditory Disease, Drug Metabolism, Glutathione Depletion In Liver                           | 25 |
| 5 | Hematological System Development and Function, Hypersensitivity Response, Tissue Morphology | 25 |

## Top Diseases and Bio Functions

### Diseases and Disorders

| Name                                | p-value             | #<br>Molecules |
|-------------------------------------|---------------------|----------------|
| Cancer                              | 7.43E-06 - 9.20E-03 | 75             |
| Organismal Injury and Abnormalities | 6.17E-05 - 9.20E-03 | 52             |
| Renal and Urological Disease        | 6.17E-05 - 9.20E-03 | 21             |
| Cardiovascular Disease              | 8.37E-05 - 9.20E-03 | 25             |
| Endocrine System Disorders          | 8.37E-05 - 9.03E-03 | 13             |

### Molecular and Cellular Functions

| Name                                   | p-value             | #<br>Molecules |
|----------------------------------------|---------------------|----------------|
| Cellular Development                   | 4.57E-07 - 9.20E-03 | 56             |
| Cellular Growth and Proliferation      | 4.57E-07 - 9.20E-03 | 57             |
| Cellular Movement                      | 2.15E-06 - 9.20E-03 | 38             |
| Cell Death and Survival                | 1.05E-05 - 9.20E-03 | 48             |
| Cell-To-Cell Signaling and Interaction | 1.38E-05 - 9.20E-03 | 40             |

### Physiological System Development and Function

| Name                                          | p-value             | #<br>Molecules |
|-----------------------------------------------|---------------------|----------------|
| Embryonic Development                         | 7.53E-07 - 9.20E-03 | 31             |
| Organismal Development                        | 7.53E-07 - 9.20E-03 | 44             |
| Tissue Development                            | 7.53E-07 - 9.20E-03 | 45             |
| Hematological System Development and Function | 4.26E-05 - 9.20E-03 | 41             |
| Tissue Morphology                             | 4.26E-05 - 9.20E-03 | 38             |

## Top Canonical Pathways

| Name                                                        | p-value  | Ratio            |
|-------------------------------------------------------------|----------|------------------|
| Regulation of the Epithelial-Mesenchymal Transition Pathway | 1.14E-03 | 6/196<br>(0.031) |
| Complement System                                           | 1.17E-03 | 4/35<br>(0.114)  |
| Ovarian Cancer Signaling                                    | 2.34E-03 | 5/152<br>(0.033) |
| Human Embryonic Stem Cell Pluripotency                      | 2.44E-03 | 5/162<br>(0.031) |
| Guanosine Nucleotides Degradation III                       | 2.89E-03 | 2/23<br>(0.087)  |

## Top Molecules

### Fold Change up-regulated

| Molecules | Exp. Value | Exp. Chart |
|-----------|------------|------------|
|-----------|------------|------------|

### Fold Change down-regulated

| Molecules | Exp. Value | Exp. Chart |
|-----------|------------|------------|
| LIPG      | ↓-14.770   |            |
| CYP1A1    | ↓-10.410   |            |
| FKBP5     | ↓-8.660    |            |
| CRISPLD2  | ↓-7.070    |            |
| MGP       | ↓-6.660    |            |
| IRX3      | ↓-5.820    |            |
| OSR1      | ↓-5.310    |            |
| MOB3B     | ↓-5.170    |            |
| CCL24     | ↓-5.140    |            |

AGTR1

↑-4.990

Top Upstream Regulators

| Upstream Regulator | p-value of overlap | Predicted Activation State |
|--------------------|--------------------|----------------------------|
| PD98059            | 1.69E-08           | Activated                  |
| Ca2+               | 2.66E-07           |                            |
| IFNG               | 2.73E-06           | Inhibited                  |
| beta-estradiol     | 3.19E-06           |                            |
| TGFB1              | 4.73E-06           |                            |

## Top My Lists

| Name | p-value | Ratio |
|------|---------|-------|
|------|---------|-------|

## Top My Pathways

| Name | p-value | Ratio |
|------|---------|-------|
|------|---------|-------|

## Top Tox Lists

| Name                                                        | p-value  | Ratio            |
|-------------------------------------------------------------|----------|------------------|
| Increases Renal Damage                                      | 9.58E-04 | 4/69<br>(0.058)  |
| Liver Proliferation                                         | 3E-03    | 6/210<br>(0.029) |
| Hepatic Fibrosis                                            | 4.28E-03 | 4/96<br>(0.042)  |
| Genes associated with Chronic Allograft Nephropathy (Human) | 6.11E-03 | 3/21<br>(0.143)  |
| NF-κB Signaling                                             | 6.43E-03 | 5/211<br>(0.024) |

## Top Tox Functions

### Assays: Clinical Chemistry and Hematology

| Name                           | p-value             | #<br>Molecules |
|--------------------------------|---------------------|----------------|
| Increased Levels of ALT        | 1.04E-02 - 1.04E-02 | 2              |
| Increased Levels of Creatinine | 3.27E-02 - 3.27E-02 | 2              |
| Increased Levels of Albumin    | 3.63E-02 - 3.63E-02 | 1              |
| Increased Levels of LDH        | 9.67E-02 - 9.67E-02 | 1              |
| Increased Levels of AST        | 1.05E-01 - 1.05E-01 | 1              |

### Cardiotoxicity

| Name                        | p-value             | #<br>Molecules |
|-----------------------------|---------------------|----------------|
| Cardiac Dysfunction         | 8.37E-05 - 8.37E-05 | 2              |
| Cardiac Stenosis            | 1.71E-03 - 9.20E-03 | 4              |
| Cardiac Necrosis/Cell Death | 9.20E-03 - 1.84E-01 | 4              |
| Cardiac Damage              | 1.83E-02 - 1.83E-02 | 1              |
| Cardiac Degeneration        | 1.83E-02 - 1.83E-02 | 1              |

### Hepatotoxicity

| Name                                 | p-value             | #<br>Molecules |
|--------------------------------------|---------------------|----------------|
| Liver Hyperplasia/Hyperproliferation | 9.58E-04 - 2.70E-01 | 11             |
| Hepatocellular Carcinoma             | 1.42E-03 - 6.42E-02 | 9              |
| Liver Proliferation                  | 2.15E-03 - 2.83E-01 | 6              |
| Liver Regeneration                   | 1.83E-02 - 6.67E-02 | 2              |
| Liver Necrosis/Cell Death            | 2.66E-02 - 2.48E-01 | 4              |

**Nephrotoxicity**

| Name                      | p-value             | #<br>Molecules |
|---------------------------|---------------------|----------------|
| Renal Atrophy             | 2.55E-04 - 1.53E-01 | 4              |
| Renal Inflammation        | 1.36E-03 - 8.83E-02 | 7              |
| Renal Nephritis           | 1.36E-03 - 8.83E-02 | 7              |
| Renal Necrosis/Cell Death | 2.56E-03 - 5.13E-01 | 9              |
| Kidney Failure            | 8.02E-03 - 2.71E-02 | 4              |
