# Supplementary material
Source: publisher figshare collection journal article supplement (https://tandf.figshare.com/articles/dataset/_/1568573)
Supplement: Supplementary file 4 [file 4]

**Supplementary Table 2: Differentially Expressed Genes (DEGs) between DEX and CTR groups (DEX vs. CTR).**

| #  | Agilent Array ID | Symbol    | Corresponding Gene | Gene Full Name                                                                      | ENTREZ ID | Fold change | q Value (FDR%) |
|----|------------------|-----------|--------------------|-------------------------------------------------------------------------------------|-----------|-------------|----------------|
| 1  | A_73_100146      | LOC509808 | LIPG               | lipase, endothelial                                                                 | 509808    | -14.76      | 0.00           |
| 2  | A_73_107233      | CYP1A1    | CYP1A1             | cytochrome P450, subfamily I (aromatic compound-inducible), polypeptide 1           | 282870    | -10.41      | 2.75           |
| 3  | A_73_117912      | LOC535704 | FKBP5              | FK506 binding protein 5                                                             | 535704    | -8.65       | 1.87           |
| 4  | A_73_118642      | LOC505329 | CRISPLD2           | cysteine-rich secretory protein LCCL domain containing 2                            | 505329    | -7.07       | 2.75           |
| 5  | A_73_120575      | MGP       | MGP                | matrix Gla protein                                                                  | 282660    | -6.66       | 2.75           |
| 6  | A_73_108526      | LOC510967 | CTSW               | cathepsin W                                                                         | 510967    | -6.35       | 1.87           |
| 7  | A_73_108314      | LOC540417 | IRX3               | iroquois homeobox 3                                                                 | 540417    | -5.82       | 5.04           |
| 8  | A_73_108050      | XLKD1     | LYVE1              | lymphatic vessel endothelial hyaluronan receptor 1                                  | 404179    | -5.74       | 1.87           |
| 9  | A_73_119473      | LOC539430 | OSR1               | odd-skipped related 1 (Drosophila)                                                  | 539430    | -5.3        | 3.30           |
| 10 | A_73_111228      | LOC540817 | MOB3B              | MOB kinase activator 3B                                                             | 540817    | -5.17       | 4.55           |
| 11 | A_73_114373      | LOC617258 | CCL24              | chemokine (C-C motif) ligand 24                                                     | 617258    | -5.14       | 1.87           |
| 12 | A_73_106522      | PGF       | PGF                | placental growth factor                                                             | 280894    | -5.11       | 3.30           |
| 13 | A_73_108953      | AGTR1     | AGTR1              | angiotensin II receptor, type 1                                                     | 281607    | -4.98       | 0.00           |
| 14 | A_73_117872      | SLAM      | SLAMF1             | signaling lymphocytic activation molecule family member 1                           | 281489    | -4.93       | 4.48           |
| 15 | A_73_114230      | PGDH      | HPGD               | hydroxyprostaglandin dehydrogenase 15-(NAD)                                         | 512259    | -4.88       | 3.86           |
| 16 | A_73_111455      | LOC533844 | CD163              | CD163 molecule                                                                      | 533844    | -4.8        | 2.75           |
| 17 | A_73_114133      | LOC507449 | RASD1              | RAS, dexamethasone-induced 1                                                        | 507449    | -4.75       | 0.00           |
| 18 | A_73_112275      | CPXM      | CPXM1              | carboxypeptidase X (M14 family), member 1                                           | 532219    | -4.71       | 2.75           |
| 19 | A_73_110765      | LOC617799 | CST7               | cystatin F (leukocystatin)                                                          | 617799    | -4.7        | 3.39           |
| 20 | A_73_116484      | LOC504445 | DKK1               | dickkopf homolog 1 (Xenopus laevis)                                                 | 504445    | -4.59       | 2.75           |
| 21 | A_73_114811      | LOC504909 | ABCA10             | ATP-binding cassette, sub-family A (ABC1), member 10                                | 504909    | -4.54       | 2.55           |
| 22 | A_73_114060      | LOC535300 | TRGC6              | T-cell receptor gamma chain TRGC6                                                   | 535300    | -4.51       | 2.75           |
| 23 | A_73_100352      | MYOC      | MYOC               | myocilin, trabecular meshwork inducible glucocorticoid response                     | 281342    | -4.44       | 0.00           |
| 24 | A_73_112354      | LOC523285 | ARRDC2             | arrestin domain containing 2                                                        | 523285    | -4.4        | 2.75           |
| 25 | A_73_108054      | LOC534928 | PFKFB4             | 6-phosphofructo-2-kinase/fructose-2,6-biphosphatase 4                               | 534928    | -4.37       | 2.78           |
| 26 | A_73_116172      | EIF4B     | EIF4B              | eukaryotic translation initiation factor 4B                                         | 505850    | -4.34       | 1.87           |
| 27 | A_73_102507      | NFKBIA    | NFKBIA             | nuclear factor of kappa light polypeptide gene enhancer in B-cells inhibitor, alpha | 282291    | -4.26       | 1.87           |

|    |             |           |           |                                                                                     |        |       |      |
|----|-------------|-----------|-----------|-------------------------------------------------------------------------------------|--------|-------|------|
| 28 | A_73_110879 | LOC505824 | NTRK2     | neurotrophic tyrosine kinase, receptor, type 2                                      | 505824 | -4.04 | 4.55 |
| 29 | A_73_106942 | LOC540812 | ARMC12    | armadillo repeat containing 12                                                      | 540812 | -3.99 | 3.30 |
| 30 | A_73_109217 | LOC516318 | PER1      | period circadian clock 1                                                            | 516318 | -3.95 | 1.87 |
| 31 | A_73_111837 | PTGES     | PTGES     | prostaglandin E synthase                                                            | 282019 | -3.79 | 0.00 |
| 32 | A_73_106842 | LOC509968 | C1QC      | complement component 1, q subcomponent, C chain                                     | 509968 | -3.66 | 5.04 |
| 33 | A_73_118275 | C1QA      | C1QA      | complement component 1, q subcomponent, A chain                                     | 534961 | -3.6  | 3.86 |
| 34 | A_73_118933 | LOC504278 | ABCA9     | ATP-binding cassette, sub-family A (ABC1), member 9                                 | 504278 | -3.49 | 0.00 |
| 35 | A_73_104727 | CD3E      | CD3E      | CD3e molecule, epsilon (CD3-TCR complex)                                            | 281054 | -3.42 | 0.00 |
| 36 | A_73_121418 | SLC11A1   | SLC11A1   | solute carrier family 11 (proton-coupled divalent metal ion transporters), member 1 | 282470 | -3.42 | 3.39 |
| 37 | A_73_104525 | LOC514285 | ANGPTL5   | angiopoietin-like 5                                                                 | 514285 | -3.41 | 0.00 |
| 38 | A_73_114363 | PRF1      | PRF1      | perforin 1 (pore forming protein)                                                   | 369025 | -3.31 | 4.48 |
| 39 | A_73_102645 | CD69      | CD69      | CD69 molecule                                                                       | 281058 | -3.31 | 3.30 |
| 40 | A_73_119464 | LOC510187 | MEDAG     | mesenteric estrogen-dependent adipogenesis                                          | 510187 | -3.28 | 2.75 |
| 41 | A_73_119745 | LOC511774 | C1QTNF1   | C1q and tumor necrosis factor related protein 1                                     | 511774 | -3.17 | 1.87 |
| 42 | A_73_115704 | LOC511711 | FGL2      | fibrinogen-like 2                                                                   | 511711 | -3.16 | 1.87 |
| 43 | A_73_107180 | LOC535075 | ALDH1A2   | aldehyde dehydrogenase 1 family, member A2                                          | 535075 | -3.14 | 4.48 |
| 44 | A_73_118870 | LOC514557 | OAF       | OAF homolog (Drosophila)                                                            | 514557 | -3.09 | 1.87 |
| 45 | A_73_107724 | LRAT      | LRAT      | lecithin retinol acyltransferase (phosphatidylcholine--retinol O-acyltransferase)   | 281285 | -3.05 | 2.75 |
| 46 | A_73_119307 | LOC534389 | FAM105A   | family with sequence similarity 105, member A                                       | 534389 | -3.04 | 2.55 |
| 47 | A_73_104367 | LOC617024 | E2F2      | E2F transcription factor 2                                                          | 617024 | -3.02 | 2.75 |
| 48 | A_73_103736 | LOC536989 | PLXDC1    | plexin domain containing 1                                                          | NA     | -2.99 | 2.75 |
| 49 | A_73_100779 | LOC615535 | ENPP1     | ectonucleotide pyrophosphatase/phosphodiesterase 1                                  | 615535 | -2.97 | 0.00 |
| 50 | A_73_121104 | LOC404176 | TRD@      | T-cell receptor delta chain                                                         | 407199 | -2.94 | 2.75 |
| 51 | A_73_104591 | LOC511286 | LOC511286 | polyadenylate-binding protein 5-like                                                | 511286 | -2.92 | 3.86 |
| 52 | A_73_118155 | SNAI2     | SNAI2     | snail homolog 2 (Drosophila)                                                        | 520631 | -2.85 | 2.11 |
| 53 | A_73_100851 | LOC533166 | SORL1     | sortilin-related receptor, L(DLR class) A repeats containing                        | NA     | -2.81 | 2.78 |
| 54 | A_73_108986 | LOC523616 | C1QTNF9   | C1q and tumor necrosis factor related protein 9                                     | NA     | -2.78 | 1.87 |
| 55 | A_73_117589 | ICAM1     | ICAM1     | intercellular adhesion molecule 1                                                   | 281839 | -2.78 | 1.87 |
| 56 | A_73_115458 | LOC517232 | RECK      | reversion-inducing-cysteine-rich protein with kazal motifs                          | 517232 | -2.77 | 2.55 |
| 57 | A_73_111558 | LOC512705 | TDRD6     | tudor domain containing 6                                                           | 512705 | -2.74 | 3.30 |
| 58 | A_73_115499 | LOC513053 | OLFML2B   | olfactomedin-like 2B                                                                | 513053 | -2.7  | 2.75 |
| 59 | A_73_111072 | NP        | PNP       | purine nucleoside phosphorylase                                                     | 493724 | -2.69 | 2.55 |

|    |             |           |           |                                                                                        |           |       |      |
|----|-------------|-----------|-----------|----------------------------------------------------------------------------------------|-----------|-------|------|
| 60 | A_73_109372 | AOX1      | AOX1      | aldehyde oxidase 1                                                                     | 338074    | -2.69 | 2.75 |
| 61 | A_73_117551 | LOC529661 | TSKU      | tsukushi small leucine rich proteoglycan homolog (Xenopus laevis)                      | NA        | -2.66 | 1.87 |
| 62 | A_73_117868 | LOC509044 | LOC509044 | E2F transcription factor 6 pseudogene                                                  | 509044    | -2.64 | 2.75 |
| 63 | A_73_114013 | MMP2      | MMP2      | matrix metalloproteinase 2 (gelatinase A, 72kDa gelatinase, 72kDa type IV collagenase) | 282872    | -2.58 | 0.00 |
| 64 | A_73_110199 | LOC514062 | EHMT2     | euchromatic histone-lysine N-methyltransferase 2                                       | 514062    | -2.55 | 3.86 |
| 65 | A_73_101341 | LOC532674 | GPR116    | G protein-coupled receptor 116                                                         | 532674    | -2.55 | 1.87 |
| 66 | A_73_100213 | FZD1      | FZD1      | frizzled family receptor 1                                                             | 445417    | -2.54 | 1.87 |
| 67 | A_73_105025 | SULT1A1   | SULT1A1   | sulfotransferase family, cytosolic, 1A, phenol-preferring, member 1                    | 282485    | -2.54 | 0.00 |
| 68 | A_73_110571 | LOC507339 | C7        | complement component 7                                                                 | 507339    | -2.54 | 4.48 |
| 69 | A_73_104593 | LOC538691 | HS3ST1    | heparan sulfate (glucosamine) 3-O-sulfotransferase 1                                   | 538691    | -2.53 | 2.55 |
| 70 | A_73_117114 | LOC515235 | CCDC80    | coiled-coil domain containing 80                                                       | 515235    | -2.53 | 3.30 |
| 71 | A_73_115034 | LOC539139 | KLF9      | Kruppel-like factor 9                                                                  | 539139    | -2.52 | 1.87 |
| 72 | A_73_113155 | LOC510973 | NUMBL     | numb homolog (Drosophila)-like                                                         | 510973    | -2.48 | 4.48 |
| 73 | A_73_116772 | LOC523226 | PCDHA13   | protocadherin alpha 13                                                                 | 523226    | -2.48 | 2.75 |
| 74 | A_73_110273 | LOC513870 | HPCAL1    | hippocalcin-like 1                                                                     | 513870    | -2.48 | 0.00 |
| 75 | A_73_118201 | GCNT1     | GCNT1     | glucosaminyl (N-acetyl) transferase 1, core 2                                          | 281778    | -2.47 | 2.75 |
| 76 | A_73_103439 | LOC523294 | GLT8D2    | glycosyltransferase 8 domain containing 2                                              | 523294    | -2.46 | 2.75 |
| 77 | A_73_105124 | LOC530657 | COL6A3    | collagen, type VI, alpha 3                                                             | 530657    | -2.43 | 1.87 |
| 78 | A_73_108287 | MGC128119 | GPC3      | glypican 3                                                                             | 615239    | -2.42 | 2.75 |
| 79 | A_73_116856 | LOC518469 | GPCPD1    | glycerophosphocholine phosphodiesterase GDE1 homolog (S. cerevisiae)                   | 518469    | -2.38 | 0.00 |
| 80 | A_73_104301 | FZD4      | FZD4      | frizzled class receptor 4                                                              | 445416    | -2.37 | 0.00 |
| 81 | A_73_110545 | LOC513468 | CD244     | CD244 molecule, natural killer cell receptor 2B4                                       | 513468    | -2.36 | 2.75 |
| 82 | A_73_120343 | LOC515988 | STAT4     | signal transducer and activator of transcription 4                                     | 515988    | -2.35 | 3.86 |
| 83 | A_73_104758 | DCN       | DCN       | decorin                                                                                | 280760    | -2.35 | 2.11 |
| 84 | A_73_102351 | LOC529235 | DDIT4     | DNA-damage-inducible transcript 4                                                      | 529235    | -2.35 | 5.04 |
| 85 | A_73_112805 | LOC534859 | B3GNT8    | UDP-GlcNAc:betaGal beta-1,3-N-acetylglucosaminyltransferase 8                          | 534859    | -2.32 | 3.30 |
| 86 | A_73_118691 | MFAP2     | MFAP2     | microfibrillar-associated protein 2                                                    | NA        | -2.32 | 1.87 |
| 87 | A_73_109561 | LOC510055 | GIMAP7    | GTPase, IMAP family member 7                                                           | 100125415 | -2.29 | 5.04 |
| 88 | A_73_105084 | LOC614109 | LOC614109 | sodium/bile acid cotransporter 7-like                                                  | 614109    | -2.27 | 1.87 |

|     |             |           |           |                                                                                              |        |       |      |
|-----|-------------|-----------|-----------|----------------------------------------------------------------------------------------------|--------|-------|------|
| 89  | A_73_120962 | MGC127421 | GSN       | gelsolin                                                                                     | 535077 | -2.26 | 3.86 |
| 90  | A_73_104305 | LOC504741 | COLEC12   | collectin sub-family member 12                                                               | 504741 | -2.25 | 2.78 |
| 91  | A_73_119299 | DMBT1     | DMBT1     | deleted in malignant brain tumors 1                                                          | 404104 | -2.24 | 3.30 |
| 92  | A_73_104396 | LOC526800 | ANKRD44   | ankyrin repeat domain 44                                                                     | 526800 | -2.24 | 2.75 |
| 93  | A_73_112690 | LOXL4     | LOXL4     | lysyl oxidase-like 4                                                                         | 281904 | -2.22 | 3.86 |
| 94  | A_73_103413 | LOC510173 | SH2D3A    | SH2 domain containing 3A                                                                     | 510173 | -2.21 | 2.55 |
| 95  | A_73_105509 | PIK3R1    | PIK3R1    | phosphoinositide-3-kinase, regulatory subunit 1 (alpha)                                      | 282307 | -2.2  | 2.75 |
| 96  | A_73_105627 | LOC538419 | EPS8      | epidermal growth factor receptor pathway substrate 8                                         | 538419 | -2.19 | 0.00 |
| 97  | A_73_102713 | LOC536815 | ROBO1     | roundabout, axon guidance receptor, homolog 1 (Drosophila)                                   | 536815 | -2.18 | 1.87 |
| 98  | A_73_118731 | CCND3     | CCND3     | cyclin D3                                                                                    | 540547 | -2.17 | 0.00 |
| 99  | A_73_120257 | LOC510988 | GIMAP7    | GTPase, IMAP family member 7                                                                 | NA     | -2.17 | 1.87 |
| 100 | A_73_103818 | LOC511883 | ANKRD13A  | ankyrin repeat domain 13A                                                                    | 511883 | -2.17 | 2.55 |
| 101 | A_73_112008 | LOC540224 | RND3      | rho-related GTP-binding protein RhoE                                                         | 540224 | -2.17 | 0.00 |
| 102 | A_73_116912 | PTPN13    | PTPN13    | protein tyrosine phosphatase, non-receptor type 13 (APO-1/CD95 (Fas)-associated phosphatase) | 282333 | -2.16 | 2.75 |
| 103 | A_73_120676 | LOC508029 | TRPM2     | transient receptor potential cation channel, subfamily M, member 2                           | 508029 | -2.14 | 4.48 |
| 104 | A_73_118934 | LOC507012 | TACC1     | transforming, acidic coiled-coil containing protein 1                                        | 507012 | -2.13 | 1.87 |
| 105 | A_73_103264 | MYO10     | MYO10     | myosin X                                                                                     | 281935 | -2.13 | 4.55 |
| 106 | A_73_110964 | LOC534512 | HMCN2     | hemicentin 2                                                                                 | 534512 | -2.13 | 1.87 |
| 107 | A_73_109408 | SERPING1  | SERPING1  | serpin peptidase inhibitor, clade G (C1 inhibitor), member 1                                 | 281035 | -2.13 | 1.87 |
| 108 | A_73_120175 | LOC616702 | LOC616702 | polyhomeotic-like protein 2-like                                                             | 616702 | -2.12 | 3.39 |
| 109 | A_73_110662 | ms4A8B    | MS4A8B    | membrane-spanning 4-domains, subfamily A, member 8B                                          | 415111 | -2.12 | 1.87 |
| 110 | A_73_104788 | LOC539762 | ZFHX4     | zinc finger homeobox 4                                                                       | 539762 | -2.12 | 3.39 |
| 111 | A_73_110856 | LOC538590 | COL5A2    | collagen, type V, alpha 2                                                                    | 538590 | -2.11 | 4.48 |
| 112 | A_73_106577 | LOC518833 | CYFIP2    | cytoplasmic FMR1 interacting protein 2                                                       | 518833 | -2.1  | 4.48 |
| 113 | A_73_101912 | EGFR      | EGFR      | epidermal growth factor receptor                                                             | 407217 | -2.09 | 5.04 |
| 114 | A_73_114788 | LOC505220 | PTPN9     | protein tyrosine phosphatase, non-receptor type 9                                            | 505220 | -2.09 | 2.78 |
| 115 | A_73_118971 | LOC527934 | CORO7     | coronin 7                                                                                    | 527934 | -2.09 | 1.87 |
| 116 | A_73_108023 | LOC539216 | KRT26     | keratin 26                                                                                   | 539216 | -2.08 | 4.48 |
| 117 | A_73_109510 | LOC505067 | ZNF404    | zinc finger protein 404                                                                      | 505067 | -2.08 | 2.75 |
| 118 | A_73_108520 | LOC617566 | BMP6      | bone morphogenetic protein 6                                                                 | 617566 | -2.07 | 2.75 |

|     |             |           |           |                                                                                   |        |       |          |
|-----|-------------|-----------|-----------|-----------------------------------------------------------------------------------|--------|-------|----------|
| 119 | A_73_111335 | LOC507890 | PRDM8     | PR domain containing 8                                                            | 507890 | -2.06 | 2.78     |
| 120 | A_73_100615 | LOC533523 | DDR2      | discoidin domain receptor tyrosine kinase 2                                       | 533523 | -2.05 | 0.00     |
| 121 | A_73_102824 | MGC127307 | KLF6      | Kruppel-like factor 6                                                             | 505884 | -2.04 | 2.78     |
| 122 | A_73_105540 | GABARAPL1 | GABARAPL1 | GABA(A) receptor-associated protein like 1                                        | 338472 | -2.03 | 2.75     |
| 123 | A_73_107041 | LOC534787 | ITIH5     | inter-alpha-trypsin inhibitor heavy chain family, member 5                        | 534787 | -2.03 | 0.00     |
| 124 | A_73_117183 | LGALS4    | LGALS4    | lectin, galactoside-binding, soluble, 4                                           | 614804 | -2    | 2.75     |
| 125 | A_73_117734 | EE898361  | EST       | B13281A FFB Bos taurus cDNA clone B1328 3-, mRNA sequence                         | NA     | -6.47 | 3.385321 |
| 126 | A_73_121153 | BI774772  | EST       | 466988 MARC 1BOV Bos taurus cDNA 5-, mRNA sequence                                | NA     | -5.51 | 0        |
| 127 | A_73_102870 | BE757006  | EST       | 211333 MARC 2BOV Bos taurus cDNA 5-, mRNA sequence                                | NA     | -5.28 | 2.754722 |
| 128 | A_73_116074 | CB420054  | EST       | 592969 MARC 6BOV Bos taurus cDNA 3-, mRNA sequence                                | NA     | -5.11 | 2.754722 |
| 129 | A_73_115556 | BF602046  | EST       | 267182 MARC 3BOV Bos taurus cDNA 5-, mRNA sequence                                | NA     | -5.07 | 1.873211 |
| 130 | A_73_104896 | BM251639  | EST       | BOTL0100011_E09 Normalized Bovine Total Leukocyte cDNA Library, mRNA sequence     | NA     | -4.76 | 2.754722 |
| 131 | A_73_101432 | AV612448  | EST       | AV612448 Bos taurus lung fetus Bos taurus cDNA clone E1LU045F02 3-, mRNA sequence | NA     | -4.57 | 3.29848  |
| 132 | A_73_105610 | CB457253  | EST       | 714591 MARC 6BOV Bos taurus cDNA 5-, mRNA sequence                                | NA     | -4.38 | 1.873211 |
| 133 | A_73_101119 | BM929188  | EST       | LM24HW00494 Bos taurus LM-24-HW cDNA library Bos taurus cDNA clone                | NA     | -4.05 | 1.873211 |
| 134 | A_73_107216 | CB468423  | EST       | 734243 MARC 6BOV Bos taurus cDNA 3-, mRNA sequence                                | NA     | -4.02 | 2.754722 |
| 135 | A_73_105437 | BE590089  | EST       | 197038 BARC 5BOV Bos taurus cDNA 5-, mRNA sequence                                | NA     | -3.94 | 2.107362 |
| 136 | A_73_104653 | EE911626  | EST       | A46231A FFB Bos taurus cDNA clone A4623 3-, mRNA sequence                         | NA     | -3.73 | 1.873211 |
| 137 | A_73_115308 | BF076063  | EST       | 225461 MARC 2BOV Bos taurus cDNA 5-, mRNA sequence                                | NA     | -3.71 | 3.860816 |

|     |             |          |     |                                                                                                                                                |    |       |          |
|-----|-------------|----------|-----|------------------------------------------------------------------------------------------------------------------------------------------------|----|-------|----------|
| 138 | A_73_101427 | EE902681 | EST | B38100A FFB Bos taurus cDNA clone B3810 5-, mRNA sequence                                                                                      | NA | -3.51 | 1.873211 |
| 139 | A_73_104046 | BE668539 | EST | 158369 MARC 4BOV Bos taurus cDNA 5-, mRNA sequence                                                                                             | NA | -3.5  | 0        |
| 140 | A_73_118346 | CB530263 | EST | 737046 MARC 6BOV Bos taurus cDNA 3-, mRNA sequence                                                                                             | NA | -3.34 | 2.107362 |
| 141 | A_73_111525 | EE906844 | EST | A19370A FFB Bos taurus cDNA clone A1937 5-, mRNA sequence                                                                                      | NA | -3.24 | 1.873211 |
| 142 | A_73_121057 | EE912709 | EST | A52341A FFB Bos taurus cDNA clone A5234 3-, mRNA sequence                                                                                      | NA | -3.23 | 0        |
| 143 | A_73_100263 | hmm89873 | EST | Bos taurus similar to Homo sapiens SWI/SNF related, matrix associated, actin dependent regulator of chromatin, subfamily d, member 2 (SMARCD2) | NA | -3.22 | 5.036463 |
| 144 | A_73_117300 | CB448153 | EST | 702214 MARC 6BOV Bos taurus cDNA 5-, mRNA sequence                                                                                             | NA | -3.2  | 1.873211 |
| 145 | A_73_120831 | AV613356 | EST | AV613356 Bos taurus adipocyte cell line Bos taurus cDNA clone E0AD003F06 3-, mRNA sequence                                                     | NA | -3.18 | 4.483749 |
| 146 | A_73_104923 | BM251291 | EST | BOTL0100004XE05R Normalized Bovine Total Leukocyte cDNA Library, mRNA sequence                                                                 | NA | -3.18 | 2.754722 |
| 147 | A_73_117696 | AV664629 | EST | AV664629 Bos taurus brain fetus Bos taurus cDNA clone E1BR043E08 5-, mRNA sequence                                                             | NA | -3.15 | 2.107362 |
| 148 | A_73_107406 | CA035529 | EST | 4001394 BARC 5BOV Bos taurus cDNA clone 5BOV_78I15 3-, mRNA sequence                                                                           | NA | -3.13 | 3.29848  |
| 149 | A_73_119914 | CB463539 | EST | 723921 MARC 6BOV Bos taurus cDNA 5-, mRNA sequence                                                                                             | NA | -3.05 | 3.385321 |
| 150 | A_73_105393 | CB441503 | EST | 691988 MARC 6BOV Bos taurus cDNA 5-, mRNA sequence                                                                                             | NA | -2.99 | 3.860816 |
| 151 | A_73_115493 | AU277966 | EST | AU277966 Cloned bovine placenta cDNA Bos taurus cDNA clone placenta0009 3-, mRNA sequence                                                      | NA | -2.97 | 1.873211 |
| 152 | A_73_120047 | CB444768 | EST | 695972 MARC 6BOV Bos taurus cDNA 3-, mRNA sequence                                                                                             | NA | -2.96 | 2.754722 |
| 153 | A_73_106449 | CB459252 | EST | 718851 MARC 6BOV Bos taurus cDNA 3-, mRNA sequence                                                                                             | NA | -2.94 | 0        |

|     |             |          |     |                                                                                     |    |       |          |
|-----|-------------|----------|-----|-------------------------------------------------------------------------------------|----|-------|----------|
| 154 | A_73_117645 | CB437117 | EST | 684554 MARC 6BOV Bos taurus cDNA 5-, mRNA sequence                                  | NA | -2.86 | 2.754722 |
| 155 | A_73_120589 | CB455280 | EST | 712414 MARC 6BOV Bos taurus cDNA 5-, mRNA sequence                                  | NA | -2.76 | 4.545291 |
| 156 | A_73_103725 | EE890884 | EST | A71560A FFB Bos taurus cDNA clone A7156 5-, mRNA sequence                           | NA | -2.72 | 2.754722 |
| 157 | A_73_100461 | CB442787 | EST | 693596 MARC 6BOV Bos taurus cDNA 3-, mRNA sequence                                  | NA | -2.68 | 2.783309 |
| 158 | A_73_106056 | AW314086 | EST | 9897 MARC 4BOV Bos taurus cDNA 5-, mRNA sequence                                    | NA | -2.67 | 3.29848  |
| 159 | A_73_102653 | CB463123 | EST | 723483 MARC 6BOV Bos taurus cDNA 5-, mRNA sequence                                  | NA | -2.66 | 2.554378 |
| 160 | A_73_119171 | CB454202 | EST | 710930 MARC 6BOV Bos taurus cDNA 3-, mRNA sequence                                  | NA | -2.66 | 0        |
| 161 | A_73_113276 | AV605678 | EST | AV605678 Bos taurus kidney fetus Bos taurus cDNA clone E1KI030B12 5-, mRNA sequence | NA | -2.65 | 2.754722 |
| 162 | A_73_115578 | BE751862 | EST | 204100 MARC 2BOV Bos taurus cDNA 5-, mRNA sequence                                  | NA | -2.63 | 2.754722 |
| 163 | A_73_119001 | AU233205 | EST | AU233205 Cloned bovine fetus cDNA Bos taurus cDNA clone Cln2639 3-, mRNA sequence   | NA | -2.61 | 3.29848  |
| 164 | A_73_108977 | BE808713 | EST | 213977 MARC 2BOV Bos taurus cDNA 5-, mRNA sequence                                  | NA | -2.6  | 1.873211 |
| 165 | A_73_103649 | EE897589 | EST | B09160A FFB Bos taurus cDNA clone B0916 5-, mRNA sequence                           | NA | -2.52 | 0        |
| 166 | A_73_102260 | CB461540 | EST | 721519 MARC 6BOV Bos taurus cDNA 5-, mRNA sequence                                  | NA | -2.51 | 2.107362 |
| 167 | A_73_108130 | CB421364 | EST | 594380 MARC 6BOV Bos taurus cDNA 5-, mRNA sequence                                  | NA | -2.49 | 2.754722 |
| 168 | A_73_110101 | EE927967 | EST | C50790A FLM Bos taurus cDNA clone C5079 5-, mRNA sequence                           | NA | -2.49 | 2.783309 |
| 169 | A_73_119452 | AU234098 | EST | AU234098 Bovine placenta cDNA Bos taurus cDNA clone Cln689 3-, mRNA sequence        | NA | -2.48 | 1.873211 |
| 170 | A_73_119380 | BE756602 | EST | 210787 MARC 2BOV Bos taurus cDNA 5-, mRNA sequence                                  | NA | -2.48 | 0        |

|     |             |           |                           |                                                                                           |    |       |          |
|-----|-------------|-----------|---------------------------|-------------------------------------------------------------------------------------------|----|-------|----------|
| 171 | A_73_107480 | CB531076  | EST                       | 742326 MARC 6BOV Bos taurus cDNA 3-, mRNA sequence                                        | NA | -2.44 | 2.554378 |
| 172 | A_73_115732 | CB443118  | EST                       | 693981 MARC 6BOV Bos taurus cDNA 5-, mRNA sequence                                        | NA | -2.39 | 1.873211 |
| 173 | A_73_116546 | AV591119  | EST                       | AV591119 Bos taurus brain fetus Bos taurus cDNA clone E1BR016G01 3-, mRNA sequence        | NA | -2.39 | 4.483749 |
| 174 | A_73_103623 | CB434062  | EST                       | 610645 MARC 6BOV Bos taurus cDNA 5-, mRNA sequence                                        | NA | -2.37 | 1.873211 |
| 175 | A_73_116770 | EE904623  | EST                       | B49130A FFB Bos taurus cDNA clone B4913 5-, mRNA sequence                                 | NA | -2.35 | 2.754722 |
| 176 | A_73_101194 | AU278667  | EST                       | AU278667 Cloned bovine placenta cDNA Bos taurus cDNA clone placenta0908 3-, mRNA sequence | NA | -2.34 | 1.873211 |
| 177 | A_73_118075 | BE664117  | EST                       | 148327 MARC 4BOV Bos taurus cDNA 5-, mRNA sequence                                        | NA | -2.32 | 2.783309 |
| 178 | A_73_121311 | EE909038  | EST                       | A03950A FFB Bos taurus cDNA clone A0395 5-, mRNA sequence                                 | NA | -2.32 | 1.873211 |
| 179 | A_73_115999 | AU233009  | EST                       | AU233009 Cloned bovine fetus cDNA Bos taurus cDNA clone Cln2358 3-, mRNA sequence         | NA | -2.3  | 2.754722 |
| 180 | A_73_118549 | EE891345  | EST                       | A01741A FFB Bos taurus cDNA clone A0174 3-, mRNA sequence                                 | NA | -2.29 | 2.754722 |
| 181 | A_73_120769 | BM087935  | EST                       | 501266 MARC 2BOV Bos taurus cDNA 5-, mRNA sequence                                        | NA | -2.29 | 3.29848  |
| 182 | A_73_104104 | AW670011  | EST                       | 113707 MARC 1BOV Bos taurus cDNA 5-, mRNA sequence                                        | NA | -2.27 | 1.873211 |
| 183 | A_73_112368 | BI540081  | EST                       | 453023 MARC 1BOV Bos taurus cDNA 5-, mRNA sequence                                        | NA | -2.26 | 2.107362 |
| 184 | A_73_109549 | BM087067  | EST                       | 499723 MARC 2BOV Bos taurus cDNA 5-, mRNA sequence                                        | NA | -2.22 | 1.873211 |
| 185 | A_73_110980 | AW417127  | EST                       | 53100 MARC 1BOV Bos taurus cDNA 5-, mRNA sequence                                         | NA | -2.22 | 0        |
| 186 | A_73_106175 | EE904189  | EST                       | B46500A FFB Bos taurus cDNA clone B4650 5-, mRNA sequence                                 | NA | -2.22 | 2.783309 |
| 187 | A_73_115949 | LOC509513 | uncharacterized LOC509513 | ////                                                                                      | NA | -2.11 | 1.873211 |
| 188 | A_73_113881 | LOC518677 | Withdrawn                 | ////                                                                                      | NA | -2.1  | 1.873211 |
| 189 | A_73_113483 | LOC615516 | Withdrawn                 | ////                                                                                      | NA | -2.1  | 5.036463 |



|     |             |           |           |      |    |       |          |
|-----|-------------|-----------|-----------|------|----|-------|----------|
| 190 | A_73_104118 | LOC520492 | Withdrawn | //// | NA | -2.09 | 4.545291 |
| 191 | A_73_114289 | LOC540066 | Withdrawn | //// | NA | -2.08 | 5.036463 |
| 192 | A_73_118629 | LOC530791 | Withdrawn | //// | NA | -2.07 | 3.29848  |
| 193 | A_73_111205 | LOC537532 | Withdrawn | //// | NA | -2.04 | 2.754722 |
| 194 | A_73_105716 | LOC537902 | Withdrawn | //// | NA | -2.03 | 3.860816 |
| 195 | A_73_100558 | LOC514145 | Withdrawn | //// | NA | -2.02 | 1.873211 |
| 196 | A_73_108800 | LOC617970 | Withdrawn | //// | NA | -2.01 | 0        |
| 197 | A_73_116241 | LOC617194 | Withdrawn | //// | NA | -2.01 | 2.754722 |
| 198 | A_73_116068 | LOC520357 | Withdrawn | //// | NA | -2    | 4.545291 |

**NOTES:***EST: Estimated Sequence Tag**NA: Not Available**Withdrawn: Not available anymore in the genebank database (*
