# Supplementary material
Source: publisher figshare collection journal article supplement (https://tandf.figshare.com/articles/dataset/_/1568573)
Supplement: Supplementary file 5 [file 4]

**Supplementary Table 1:** Oligonucleotide sequences for qPCR.

| Gene acronym             | Gene name                                                                              | NCBI RefSeq  | Primer sequence<br>5' >>> 3'                                                           | Amplicon size<br>(bp) <sup>a</sup> |
|--------------------------|----------------------------------------------------------------------------------------|--------------|----------------------------------------------------------------------------------------|------------------------------------|
| <b>RPLP0<sup>b</sup></b> | Ribosomal protein, large, P0                                                           | NM_001012682 | F: CAA CCC TGA AGT GCT TGA CAT <sup>c</sup><br>R: AGG CAG ATG GAT CAG CCA <sup>c</sup> | 227                                |
| <b>GAPDH<sup>b</sup></b> | Glyceraldehyde-3-phosphate dehydrogenase                                               | NM_001034034 | F: ACA CCC TCA AGA TTG TCA GCA A<br>R: TCA TAA GTC CCT CCA CGA TGC                     | 82                                 |
| <b>TBP<sup>b</sup></b>   | TATA box binding protein                                                               | NM_001075742 | F: ACA ACA GCC TCC CAC CCT ATG C<br>R: GTG GAG TCA GTC CTG TGC CGT AA                  | 111                                |
| <b>C7</b>                | Complement component 7                                                                 | NM_001045966 | F: GGA CGG TGC TGA TGA AGA CA<br>R: TGT AAC CAC GTC CGG TAA GC                         | 101                                |
| <b>CCDC80</b>            | Coiled-coil domain containing 80                                                       | NM_001098982 | F: GTC ACT GGA AAA CTT CCT AT CCA<br>R: CAT CAT TAG GGG CCG AGA T                      | 71                                 |
| <b>CRISPLD2</b>          | Cysteine-rich secretory protein LCCL domain containing 2                               | NM_001100299 | F: AGT CAG AGA GAA ACG GCG TG<br>R: GTG GTG TAG CAG TCC AGG TC                         | 100                                |
| <b>FKBP5</b>             | FK506 binding protein 5                                                                | NM_001192862 | F: GTG GAG TGC TGC GAC AAG<br>R: CTT GGC TGA CTC GAA CTC GT                            | 105                                |
| <b>LIPG (LOC509808)</b>  | Endothelial lipase-like                                                                | XM_002697766 | F: CGC CTA TTG TGG CTT TGC<br>R: GCG GAG GTT AAA TCT CAC AGG                           | 127                                |
| <b>MMP2</b>              | Matrix metalloproteinase 2 (gelatinase A, 72kDa gelatinase, 72kDa type IV collagenase) | NM_174745    | F: CGA TGC TGT GTA CGA AGA CC<br>R: CTG GCT GAA TAG ACC CAG TAT TC                     | 78                                 |
| <b>MYOC</b>              | Myocilin, trabecular meshwork inducible glucocorticoid response                        | NM_174118    | F: CAG CAG CTC TCA GGA CGT G<br>R: GTC CAT GTT CTC CAA ATT CCA                         | 67                                 |
| <b>RASD1</b>             | RAS, dexamethasone-induced 1                                                           | NM_001206261 | F: CAC CGC AAG TTC TAC TGC AT<br>R: GCT GAA CAC CAG GAT GAA CA                         | 132                                |
| <b>SULT1A1</b>           | Sulfotransferase family, cytosolic, 1A, phenol-preferring, member 1                    | NM_177521    | F: CAC GGC TCC TCA AGA CAC ACT<br>R: GGG CGA TGT AGA TCA CCT TG                        | 84                                 |
| <b>CYP1A1</b>            | Cytochrome P450, subfamily I (aromatic compound-inducible), polypeptide 1              | XM_002696635 | F: GGC CTT TAT CCT GGA GAC CT<br>R: AAG CCG TTC AGA TTG CTG TC                         | 90                                 |
| <b>CCL24</b>             | Chemokine (C-C motif) ligand 24                                                        | NM_001046596 | F: GCT ACC AGC TTA CCA ACA GGA<br>R: GAA CTT CTG GCC CTT CTG G                         | 74                                 |
| <b>PFKFB4</b>            | 6-phosphofructo-2-kinase/fructose-2,6-biphosphatase 4                                  | NM_001192835 | F: CGG GAT CTG TCC TAC ATC AAG<br>R: CAC GCG GTT CAC GAC ATA                           | 60                                 |
| <b>C1QA</b>              | Complement component 1, q subcomponent, A chain                                        | NM_001014945 | F: CCT GGA AAC CCA GGC AGA AT<br>R: TGG CTG GTC CTT GAT GTT CC                         | 114                                |
| <b>MEDAG</b>             | Mesenteric estrogen-dependent adipogenesis                                             | NM_001083660 | F: TCC AGA AAA GAA GGA GAC CATT<br>R: TGC AAT TAA AAA CTT CAT CTA TTG AAC              | 131                                |
| <b>FGL2</b>              | Fibrinogen-like 2                                                                      | NM_001046097 | F: GGCAAATGTTTCATCTAAGTGTCC<br>R: ACTGCTTCTTTGCCTATTGTGT                               | 114                                |
| <b>HSPA8</b>             | Heat shock 70kDa protein 8                                                             | NM_174345    | F: AAC CAA GTC GCA ATG AAT CC<br>R: GCA TCA TCA AAT CTT CGT CCA                        | 74                                 |

<sup>a</sup> Base Pairs; <sup>b</sup> Reference gene; <sup>c</sup> Robinson et al., 2007.
